# Supplementary material
Source: HighWire-hosted journal article supplement (https://diabetes.diabetesjournals.org/content/suppl/2007/01/19/db06-1242)
Supplement: db06-1242_Supplementary_Table4.pdf [file db06-1242_Supplementary_Table4.pdf]

**Supplementary Table 4:** Classification of the 35 up-regulated genes containing a recognition motif for the transcription factor MTF1 in their promoter sequences.

| <b>UGCluster</b> | <b>Symbol</b>   | <b>Name</b>                                                              | <b>Pathways and possible functions</b>                       | <b>Tissue</b>                      |
|------------------|-----------------|--------------------------------------------------------------------------|--------------------------------------------------------------|------------------------------------|
| Hs.52931         | <b>ADRA1A</b>   | Adrenergic, alpha-1A-, receptor                                          | induced in response to stress                                | Adipose Tissue                     |
| Hs.293274        | <b>APCDD1</b>   | Adenomatosis polyposis coli down-regulated 1                             | unknown                                                      | Adipose Tissue                     |
| Hs.291196        | <b>ATP1B1</b>   | ATPase, Na <sup>+</sup> /K <sup>+</sup> transporting, beta 1 polypeptide | induced in ischemic stress                                   | Skeletal Muscle                    |
| Hs.584744        | <b>CAPS</b>     | Calcyphosine                                                             | calcium signaling                                            | Skeletal Muscle                    |
| Hs.334347        | <b>CKM</b>      | Creatine kinase, muscle                                                  | reponse to stress/energy metabolism                          | Skeletal Muscle                    |
| Hs.530904        | <b>CSR2P2</b>   | Cysteine and glycine-rich protein 2                                      | cell differentiation                                         | Adipose Tissue                     |
| Hs.435369        | <b>FHL1</b>     | Four and a half LIM domains 1                                            | muscle development                                           | Skeletal Muscle                    |
| Hs.432132        | <b>G0S2</b>     | G0/G1switch 2                                                            | cell cycle regulation                                        | Skeletal Muscle                    |
| Hs.484741        | <b>GMPr</b>     | Guanosine monophosphate reductase                                        | nucleotide metabolism                                        | Skeletal Muscle                    |
| Hs.591761        | <b>HOMER1</b>   | Homer homolog 1 (Drosophila)                                             | early gene family/ plasticity                                | Skeletal Muscle                    |
| Hs.499205        | <b>IRX3</b>     | Iroquois homeobox protein 3                                              | transcription regulation                                     | Adipose Tissue                     |
| Hs.20107         | <b>KNS2</b>     | Kinesin 2                                                                | vesicle trafficking                                          | Skeletal Muscle                    |
| Hs.475353        | <b>LMCD1</b>    | LIM and cysteine-rich domains 1                                          | unknown function                                             | Skeletal Muscle                    |
| Hs.431850        | <b>MAPK1</b>    | Mitogen-activated protein kinase 1                                       | induced in reponse to stress:/regulation of apoptosis        | Skeletal Muscle                    |
| Hs.645367        | <b>MT1B</b>     | Metallothionein 1b                                                       | protection against heavy metal toxicity and oxidative stress | Skeletal Muscle                    |
| Hs.513626        | <b>MT1F</b>     | Metallothionein 1F (functional)                                          | protection against heavy metal toxicity and oxidative stress | Skeletal Muscle                    |
| Hs.438462        | <b>MT1H</b>     | Metallothionein 1H                                                       | protection against heavy metal toxicity and oxidative stress | Skeletal Muscle                    |
| Hs.374950        | <b>MT1X</b>     | Metallothionein 1X                                                       | protection against heavy metal toxicity and oxidative stress | Skeletal Muscle                    |
| Hs.534330        | <b>MT2A</b>     | Metallothionein 2A                                                       | protection against heavy metal toxicity and oxidative stress | Skeletal Muscle                    |
| Hs.485903        | <b>MYBPC1</b>   | Myosin binding protein C, slow type                                      | cytoskeleton/myosin fiber contraction                        | Skeletal Muscle                    |
| Hs.67201         | <b>NT5C</b>     | 5', 3'-nucleotidase, cytosolic                                           | nucleotide metabolism                                        | Adipose Tissue                     |
| Hs.148778        | <b>OXR1</b>     | Oxidation resistance 1                                                   | protection against oxidative stress                          | Skeletal Muscle                    |
| Hs.284491        | <b>PDXK</b>     | Pyridoxal (pyridoxine, vitamin B6) kinase                                | protection against oxidative stress-induced apoptosis        | Adipose Tissue                     |
| Hs.26010         | <b>PFKP</b>     | Phosphofructokinase, platelet                                            | induced in response to stress/energy metabolism              | Adipose Tissue                     |
| Hs.558495        | <b>PLEKHA8</b>  | Pleckstrin homology domain containing, family A member 8                 | vesicle trafficking                                          | Adipose Tissue                     |
| Hs.79081         | <b>PPP1CC</b>   | Protein phosphatase 1, catalytic subunit, gamma isoform                  | induced by hypoxic stress                                    | Skeletal Muscle                    |
| Hs.590886        | <b>RXRa</b>     | Retinoid X receptor, alpha                                               | induced in reponse to stress/regulation of apoptosis         | Skeletal Muscle                    |
| Hs.435510        | <b>SLC25A45</b> | solute carrier family 25, member 45                                      | transporter, unknown ligand                                  | Skeletal Muscle                    |
| Hs.369592        | <b>THADA</b>    | Thyroid adenoma associated                                               | unknown function                                             | Adipose Tissue                     |
| Hs.478275        | <b>TNFSF10</b>  | Tumor necrosis factor (ligand) superfamily, member 10                    | apoptosis/ inflammation                                      | Skeletal Muscle and Adipose Tissue |
| Hs.507916        | <b>TSC22D1</b>  | TSC22 domain family, member 1                                            | early gene family/inflammation and apoptosis                 | Skeletal Muscle                    |
| Hs.532277        | <b>ZNF250</b>   | Zinc finger protein 250                                                  | transcription regulation                                     | Adipose Tissue                     |
| Hs.121347        | <b>C10orf82</b> | Chromosome 10 open reading frame 82                                      | unknown function                                             | Adipose Tissue                     |
| Hs.179260        | <b>C14orf4</b>  | Chromosome 14 open reading frame 4                                       | unknown function                                             | Adipose Tissue                     |
| Hs.154652        | <b>C8orf72</b>  | Chromosome 8 open reading frame 72                                       | unknown function                                             | Adipose Tissue                     |
