# Supplementary material
Source: HighWire-hosted journal article supplement (https://diabetes.diabetesjournals.org/content/suppl/2007/01/19/db06-1242)
Supplement: db06-1242_Supplementary_Table_1.pdf [file db06-1242_Supplementary_Table_1.pdf]

**Supplementary Table 1: List of the 316 genes regulated during hyperglycemic euisulinemic clamp in skeletal muscle.**

| UGCluster                                              | Name                                                                                                             | Symbol   | Fold Change | Cytoband      |
|--------------------------------------------------------|------------------------------------------------------------------------------------------------------------------|----------|-------------|---------------|
| <b><u>Response to stress</u></b>                       |                                                                                                                  |          |             |               |
| Hs.517581                                              | Heme oxygenase (decycling) 1                                                                                     | HMOX1    | 3.80        | 22q12         |
| Hs.374950                                              | Metallothionein 1X                                                                                               | MT1X     | 2.20        | 16q13         |
| Hs.460867                                              | Metallothionein 1B (functional)                                                                                  | MT1B     | 1.70        | 16q13         |
| Hs.148778                                              | Oxidation resistance 1                                                                                           | OXR1     | 1.60        | 8q23          |
| Hs.513626                                              | Metallothionein 1F (functional)                                                                                  | MT1F     | 1.47        | 16q13         |
| Hs.534330                                              | Metallothionein 2A                                                                                               | MT2A     | 1.45        | 16q13         |
| Hs.438462                                              | Metallothionein 1H                                                                                               | MT1H     | 1.42        | 16q13         |
| Hs.523836                                              | Glutathione S-transferase pi                                                                                     | GSTP1    | -1.74       | 11q13         |
| Hs.459952                                              | Stannin                                                                                                          | SNN      | -1.92       | 16p13         |
| <b><u>Immune response, cytokines &amp; related</u></b> |                                                                                                                  |          |             |               |
| Hs.478275                                              | TNF (ligand) superfamily, member 10 (TRAIL)                                                                      | TNFSF10  | 1.58        | 3q26          |
| Hs.278573                                              | CD59 antigen p18-20 (protectin)                                                                                  | CD59     | 1.49        | 11p13         |
| Hs.534847                                              | Complement component 4B, telomeric                                                                               | C4A      | 1.47        | 6p21.3        |
| Hs.535668                                              | Immunoglobulin lambda variable 6-57                                                                              | IGLV6-57 | 1.40        | 22q11.2       |
| Hs.529846                                              | Calcium modulating ligand                                                                                        | CAMLG    | -1.40       | 5q23          |
| Hs.193516                                              | B-cell CLL/lymphoma 10                                                                                           | BCL10    | -1.40       | 1p22          |
| Hs.840                                                 | Indoleamine-pyrrole 2,3 dioxygenase                                                                              | INDO     | -1.40       | 8p12-p11      |
| Hs.201083                                              | Mal, T-cell differentiation protein 2                                                                            | MAL2     | -1.44       |               |
| Hs.522805                                              | CD99 antigen-like 2                                                                                              | CD99L2   | -1.45       | Xq28          |
| Hs.50002                                               | Chemokine (C-C motif) ligand 19                                                                                  | CCL19    | -1.45       | 9p13          |
| Hs.350268                                              | Interferon regulatory factor 2 binding protein 2                                                                 | IRF2BP2  | -1.47       | 1q42.3        |
| Hs.567249                                              | Contactin 1                                                                                                      | CNTN1    | -1.47       | 12q11-q12     |
| Hs.132807                                              | MHC class I mRNA fragment 3.8-1                                                                                  | 3.8-1    | -1.48       | 6p21.3        |
| Hs.416925                                              | Carcinoembryonic antigen-related cell adhesion molecule 19                                                       | CEACAM19 | -1.49       | 19q13.31      |
| Hs.89546                                               | Selectin E (endothelial adhesion molecule 1)                                                                     | SELE     | -1.54       | 1q22-q25      |
| Hs.436854                                              | Family with sequence similarity 19 (chemokine (C-C motif)-like), member A5                                       | FAM19A5  | -1.59       | 22q13.32      |
| Hs.372679                                              | Fc fragment of IgG, low affinity IIIb, receptor (CD16b)                                                          | FCGR3B   | -1.59       | 1q23          |
| Hs.517227                                              | Junctional adhesion molecule 2                                                                                   | JAM2     | -1.67       | 21q21.2       |
| Hs.19413                                               | S100 calcium binding protein A12 (calgranulin C)                                                                 | S100A12  | -1.69       | 1q21          |
| Hs.534074                                              | Nuclear factor of activated T-cells                                                                              | NFATC1   | -1.71       | 18q23         |
| Hs.579550                                              | Deleted in colorectal carcinoma                                                                                  | DCC      | -1.78       | 18q21.3       |
| Hs.511748                                              | Sema domain, immunoglobulin domain (Ig), transmembrane domain (TM) and short cytoplasmic domain, (semaphorin) 4D | SEMA4D   | -1.93       | 9q22-q31      |
| <b><u>Circulating active peptides</u></b>              |                                                                                                                  |          |             |               |
| Hs.2561                                                | Nerve growth factor, beta polypeptide                                                                            | NGFB     | -1.48       | 1p13.1        |
| Hs.133379                                              | Transforming growth factor, beta 2                                                                               | TGFB2    | -1.53       | 1q41          |
| Hs.25590                                               | Stanniocalcin 1                                                                                                  | STC1     | -1.56       | 8p21-p11.2    |
| Hs.435215                                              | Vascular endothelial growth factor C                                                                             | VEGFC    | -1.69       | 4q34.1-q34.3  |
| Hs.410092                                              | Coagulation factor II (thrombin)                                                                                 | F2       | -1.70       | 11p11-q12     |
| <b><u>Receptors</u></b>                                |                                                                                                                  |          |             |               |
| Hs.494538                                              | Patched homolog (Drosophila)                                                                                     | PTCH     | -1.41       | 9q22.3        |
| Hs.23582                                               | Tumor-associated calcium signal transducer 2                                                                     | TACSTD2  | -1.44       | 1p32-p31      |
| Hs.437846                                              | Smoothened homolog (Drosophila)                                                                                  | SMO      | -1.44       | 7q32.3        |
| Hs.381225                                              | Low density lipoprotein receptor (familial hypercholesterolemia)                                                 | LDLR     | -1.46       | 19p13.3       |
| Hs.524458                                              | Integrin, beta 7                                                                                                 | ITGB7    | -1.47       | 12q13.13      |
| Hs.52931                                               | Adrenergic, alpha-1A-, receptor                                                                                  | ADRA1A   | -1.51       | 8p21-p11.2    |
| Hs.408153                                              | Taste receptor, type 2, member 49                                                                                | TAS2R49  | -1.52       | 12p13.2       |
| Hs.126667                                              | Endothelial differentiation, lysophosphatidic acid G-protein-coupled receptor, 2                                 | EDG2     | -1.53       | 9q31.3        |
| Hs.1041                                                | Proto-oncogene tyrosine-protein kinase ROS precursor                                                             | ROS1     | -1.57       | 6q22          |
| Hs.293842                                              | Transmembrane protein 71                                                                                         | TMEM71   | -1.62       | 8q24.22       |
| Hs.293917                                              | Poliovirus receptor-related 3                                                                                    | PVRL3    | -1.65       | 3q13          |
| Hs.445000                                              | Prostaglandin E receptor 3 (subtype EP3)                                                                         | PTGER3   | -1.90       | 1p31.2        |
| Hs.98255                                               | Receptor tyrosine kinase-like orphan receptor 2                                                                  | ROR2     | -2.28       | 9q22          |
| <b><u>Signaling pathways</u></b>                       |                                                                                                                  |          |             |               |
| <b><u>Protein phosphatases</u></b>                     |                                                                                                                  |          |             |               |
| Hs.79081                                               | Protein phosphatase 1, catalytic subunit, gamma isoform                                                          | PPP1CC   | 1.48        | 12q24.1-q24.2 |
| Hs.512973                                              | Protein tyrosine phosphatase-like A domain containing 1                                                          | PTPLAD1  | -1.55       | 15q22.2       |
| Hs.160871                                              | Protein tyrosine phosphatase, receptor type, O                                                                   | PTPRO    | -1.61       | 12p13.3-p13.2 |
| Hs.19281                                               | Protein tyrosine phosphatase, non-receptor type 14                                                               | PTPN14   | -1.71       | 1q32.2        |
| Hs.146339                                              | Protein phosphatase 2 (formerly 2A), regulatory subunit B (PR 52), alpha isoform                                 | PPP2R2A  | -1.71       | 8p21.2        |
| Hs.106019                                              | Protein phosphatase 1, regulatory subunit 10                                                                     | PPP1R10  | -2.05       | 6p21.3        |
| <b><u>Protein kinases</u></b>                          |                                                                                                                  |          |             |               |
| Hs.431850                                              | Mitogen-activated protein kinase 1                                                                               | MAPK1    | 1.51        | 22q11.2       |
| Hs.466987                                              | Protein kinase D2                                                                                                | PRKD2    | -1.40       | 19q13.3       |
| Hs.105818                                              | Cyclin-dependent kinase-like 3                                                                                   | CDKL3    | -1.44       | 5q31          |
| Hs.291623                                              | TAO kinase 2                                                                                                     | TAOK2    | -1.44       | 16p11.2       |
| Hs.106015                                              | Tyrosine-protein kinase HCK                                                                                      | DDEF1    | -1.45       | 8q24.1-q24.2  |
| Hs.119882                                              | Cyclin-dependent kinase 6                                                                                        | CDK6     | -1.61       | 7q21-q22      |

|           |                         |       |       |            |
|-----------|-------------------------|-------|-------|------------|
| Hs.36566  | LIM domain kinase 1     | LIMK1 | -1.65 | 7q11.23    |
| Hs.468878 | AP2 associated kinase 1 | AAK1  | -1.88 | 2p24.3-p14 |

#### **Others signaling pathways**

|           |                                                                                     |          |       |             |
|-----------|-------------------------------------------------------------------------------------|----------|-------|-------------|
| Hs.591761 | Homer homolog 1 (Drosophila)                                                        | HOMER1   | 1.69  | 5q14.2      |
| Hs.584744 | Calcyphosine                                                                        | CAPS     | 1.60  | 19p13.3     |
| Hs.584507 | FYVE, RhoGEF and PH domain containing 1 (faciogenital dysplasia)                    | FGD1     | -1.40 | Xp11.21     |
| Hs.333274 | Calneuron 1                                                                         | CALN1    | -1.42 | 7q11        |
| Hs.429434 | GRB2-associated binding protein 2                                                   | GAB2     | -1.43 | 11q14.1     |
| Hs.213424 | Secreted frizzled-related protein 1                                                 | SFRP1    | -1.44 | 8p12-p11.1  |
| Hs.188614 | Pleckstrin homology domain containing, family A member 5                            | PLEKHA5  | -1.46 | 12p12       |
| Hs.483784 | SH3 domain and tetratricopeptide repeats 2                                          | SH3TC2   | -1.47 | 5q32        |
| Hs.464985 | Ras-like without CAAX 2                                                             | RIT2     | -1.47 | 18q12.3     |
| Hs.121593 | Centaurin, alpha 1                                                                  | CENTA1   | -1.48 | 7p22.3      |
| Hs.435811 | Arrestin, beta 2                                                                    | ARRB2    | -1.48 | 17p13       |
| Hs.471508 | Insulin receptor substrate 1                                                        | IRS1     | -1.51 | 2q36        |
| Hs.81328  | Nuclear factor of kappa light polypeptide gene enhancer in B-cells inhibitor, alpha | NFKBIA   | -1.51 | 14q13       |
| Hs.190977 | Ectonucleotide pyrophosphatase/phosphodiesterase 2 (autotaxin)                      | ENPP2    | -1.52 | 8q24.1      |
| Hs.132121 | SH3-domain GRB2-like (endophilin) interacting protein 1                             | SGIP1    | -1.53 | 1p31.3      |
| Hs.2722   | Inositol 1,4,5-trisphosphate 3-kinase A                                             | ITPKA    | -1.57 | 15q14-q21   |
| Hs.113912 | Rap guanine nucleotide exchange factor (GEF) 2                                      | RAPGEF2  | -1.59 | 4q32.1      |
| Hs.157351 | GTP-binding protein PTD004                                                          | PTD004   | -1.64 | 2q31.1      |
| Hs.528993 | RalA binding protein 1                                                              | RALBP1   | -1.68 | 18p11.3     |
| Hs.591099 | RAB27A, member RAS oncogene family                                                  | RAB27A   | -1.72 | 15q15-q21.1 |
| Hs.386726 | Regulator of G-protein signalling 4                                                 | RGS4     | -1.72 | 1q23.3      |
| Hs.567314 | Phosphodiesterase 6A, cGMP-specific, rod, alpha                                     | PDE6A    | -1.74 | 5q31.2-q34  |
| Hs.43505  | Inhibitor of kappa light polypeptide gene enhancer in B-cells, kinase gamma         | IKBKG    | -1.75 | Xq28        |
| Hs.517216 | Phosphoprotein enriched in astrocytes 15                                            | PEA15    | -1.92 | 1q21.1      |
| Hs.483238 | Rho GTPase activating protein 29                                                    | ARHGAP29 | -1.96 | 1p22.1      |

#### **Enzymes**

##### **Carbohydrate metabolism**

|           |                                                                                     |        |       |              |
|-----------|-------------------------------------------------------------------------------------|--------|-------|--------------|
| Hs.513490 | Aldolase A, fructose-bisphosphate                                                   | ALDOA  | 1.62  | 16q22-q24    |
| Hs.154084 | Phosphorylase, glycogen; muscle (McArdle syndrome, glycogen storage disease type V) | PYGM   | 1.51  | 11q12-q13.2  |
| Hs.590891 | Phosphoglucomutase 3                                                                | PGM3   | -1.40 | 6q14.1-q15   |
| Hs.54941  | Phosphorylase kinase, alpha 2 (liver)                                               | PHKA2  | -1.46 | Xp22.2-p22.1 |
| Hs.31431  | Fructosamine-3-kinase-related protein                                               | FN3KRP | -1.49 | 17q25.3      |
| Hs.8364   | Pyruvate dehydrogenase kinase, isoenzyme 4                                          | PKD4   | -2.88 | 7q21.3-q22.1 |

##### **Lipid metabolism**

|           |                                           |         |       |          |
|-----------|-------------------------------------------|---------|-------|----------|
| Hs.234898 | Acetyl-Coenzyme A carboxylase beta        | ACACB   | 1.40  | 12q24.1  |
| Hs.512217 | Monoacylglycerol O-acyltransferase 3      | MOGAT3  | -1.43 | 7q22.1   |
| Hs.105269 | Sterol-C4-methyl oxidase-like             | SC4MOL  | -1.45 | 4q32-q34 |
| Hs.111256 | Arachidonate 15-lipoxygenase, second type | ALOX15B | -1.49 | 17p13.1  |
| Hs.68864  | Lipase, member H                          | LIPH    | -1.56 | 3q27     |

##### **ATPase & related**

|           |                                                                          |        |       |           |
|-----------|--------------------------------------------------------------------------|--------|-------|-----------|
| Hs.291196 | ATPase, Na <sup>+</sup> /K <sup>+</sup> transporting, beta 1 polypeptide | ATP1B1 | 1.46  | 1q24      |
| Hs.569910 | ATPase, Class I, type 8B, member 1                                       | ATP8B1 | -1.40 | 18q21-q22 |

##### **Others enzymes**

|           |                                                                                                                       |       |       |               |
|-----------|-----------------------------------------------------------------------------------------------------------------------|-------|-------|---------------|
| Hs.334347 | Creatine kinase, muscle                                                                                               | CKM   | 1.55  | 19q13.2-q13.3 |
| Hs.144567 | Alanine-glyoxylate aminotransferase (oxalosis I; hyperoxaluria I; glycolicaciduria; serine-pyruvate aminotransferase) | AGXT  | 1.45  | 2q36-q37      |
| Hs.484741 | Guanosine monophosphate reductase                                                                                     | GMPR  | 1.43  | 6p23          |
| Hs.75372  | N-acetylgalactosaminidase, alpha-                                                                                     | NAGA  | -1.50 | 22q13-qter    |
| Hs.214142 | 5,10-methylenetetrahydrofolate reductase (NADPH)                                                                      | MTHFR | -1.73 | 1p36.3        |
| Hs.135270 | Collapsin response mediator protein 1                                                                                 | CRMP1 | -1.88 | 4p16.1-p15    |
| Hs.272499 | Dehydrogenase/reductase (SDR family) member 2                                                                         | DHRS2 | -2.34 | 14q11.2       |

##### **Structural proteins & cytoskeleton**

|           |                                                                     |        |       |           |
|-----------|---------------------------------------------------------------------|--------|-------|-----------|
| Hs.516105 | Actin, gamma 2, smooth muscle, enteric                              | ACTG2  | 1.70  | 2p13.1    |
| Hs.20107  | Kinesin 2                                                           | KNS2   | 1.46  | 14q32.3   |
| Hs.13852  | Nexilin (F actin binding protein)                                   | NEXN   | 1.44  | 1p31.1    |
| Hs.485903 | Myosin binding protein C, slow type                                 | MYBPC1 | 1.42  | 12q23.3   |
| Hs.134602 | Titin                                                               | TTN    | 1.41  | 2q31      |
| Hs.516769 | EF hand domain family, member D1                                    | EFHD1  | -1.43 | 2q37.1    |
| Hs.590892 | Collagen, type IX, alpha 1                                          | COL9A1 | -1.44 | 6q12-q14  |
| Hs.369089 | Collagen, type IV, alpha 5 (Alport syndrome)                        | COL4A5 | -1.44 | Xq22      |
| Hs.407580 | Plakophilin 4                                                       | PKP4   | -1.44 | 2q23-q31  |
| Hs.121824 | Keratin 5b                                                          | K5B    | -1.45 | 12q13.13  |
| Hs.518414 | Leucine-rich repeats and calponin homology (CH) domain containing 3 | LRCH3  | -1.46 | 3q29      |
| Hs.532824 | Microtubule-associated protein, RP/EB family, member 2              | MAPRE2 | -1.48 | 18q12.1   |
| Hs.369840 | Nidogen 2 (osteonidogen)                                            | NID2   | -1.48 | 14q21-q22 |
| Hs.21213  | Myosin VA (heavy polypeptide 12, myosin)                            | MYO5A  | -1.52 | 15q21     |

|           |                                                               |        |       |            |
|-----------|---------------------------------------------------------------|--------|-------|------------|
| Hs.520554 | Tubulin tyrosine ligase-like family, member 2                 | TLL2   | -1.53 | 6q27       |
| Hs.503178 | Spectrin, beta, non-erythrocytic 1                            | SPTBN1 | -1.53 | 2p21       |
| Hs.436035 | Tubulin, alpha 6                                              | TUBA6  | -1.54 | 12q12-q14  |
| Hs.431792 | Growth arrest-specific 8                                      | GAS8   | -1.56 | 16q24.3    |
| Hs.34780  | Doublecortin; lissencephaly, X-linked (doublecortin)          | DCX    | -1.62 | Xq22.3-q23 |
| Hs.25640  | Claudin 3                                                     | CLDN3  | -1.63 | 7q11.23    |
| Hs.591727 | Sarcoglycan, delta (35kDa dystrophin-associated glycoprotein) | SGCD   | -1.65 | 5q33-q34   |
| Hs.187898 | Neurofibromin 2 (bilateral acoustic neuroma)                  | NF2    | -1.67 | 22q12.2    |
| Hs.175437 | Erythrocyte membrane protein band 4.1                         | EPB41  | -1.67 | 1p33-p32   |
| Hs.104925 | Ectodermal-neural cortex (with BTB-like domain)               | ENC1   | -1.69 | 5q12-q13.3 |
| Hs.567308 | Myosin VB                                                     | MYO5B  | -1.71 | 18q21      |
| Hs.497039 | Laminin, gamma 1 (formerly LAMB2)                             | LAMC1  | -1.86 | 1q31       |
| Hs.420269 | Collagen, type VI, alpha 2                                    | COL6A2 | -2.14 | 21q22.3    |

### **Transporters & carriers**

|           |                                                                                                         |         |       |              |
|-----------|---------------------------------------------------------------------------------------------------------|---------|-------|--------------|
| Hs.584756 | Fatty acid binding protein 3, muscle and heart (mammary-derived growth inhibitor)                       | FABP3   | -1.40 | 1p33-p32     |
| Hs.160550 | Solute carrier family 43, member 2                                                                      | SLC43A2 | -1.41 | 17p13.3      |
| Hs.274363 | Neuroglobin                                                                                             | NGB     | -1.41 | 14q24        |
| Hs.486508 | Solute carrier family 2 (facilitated glucose transporter), member 12                                    | SLC2A12 | -1.41 | 6q23.2       |
| Hs.167317 | Synaptosomal-associated protein, 25kDa                                                                  | SNAP25  | -1.44 | 20p12-p11.2  |
| Hs.14894  | Trans-golgi network protein 2                                                                           | TGOLN2  | -1.46 | 2p11.2       |
| Hs.512681 | Sodium channel, nonvoltage-gated 1, delta                                                               | SCNN1D  | -1.54 | 1p36.3-p36.2 |
| Hs.167584 | Solute carrier family 2 (facilitated glucose transporter), member 2                                     | SLC2A2  | -1.55 | 3q26.1-q26.2 |
| Hs.194816 | Stomatin (EPB72)-like 1                                                                                 | STOML1  | -1.56 | 15q24-q25    |
| Hs.30246  | Solute carrier family 19 (thiamine transporter), member 2                                               | SLC19A2 | -1.61 | 1q23.3       |
| Hs.444915 | Solute carrier family 1 (neuronal/epithelial high affinity glutamate transporter, system Xag), member 1 | SLC1A1  | -1.65 | 9p24         |
| Hs.508958 | Syntaxin binding protein 6 (amisyn)                                                                     | STXBP6  | -1.76 | 14q12        |
| Hs.484099 | Potassium large conductance calcium-activated channel, subfamily M, beta member 1                       | KCNMB1  | -1.81 | 5q34         |
| Hs.160264 | Hyperpolarization activated cyclic nucleotide-gated potassium channel 4                                 | HCN4    | -1.92 | 15q24-q25    |
| Hs.204238 | Lipocalin 2 (oncogene 24p3)                                                                             | LCN2    | -1.93 | 9q34         |

### **Transcription and DNA related proteins**

#### ***Transcription factors and transcription regulation***

|           |                                                                              |         |       |                |
|-----------|------------------------------------------------------------------------------|---------|-------|----------------|
| Hs.507916 | TSC22 domain family, member 1                                                | TSC22D1 | 1.67  | 13q14          |
| Hs.516176 | SET and MYND domain containing 1                                             | SMYD1   | 1.48  | 2p11.2         |
| Hs.370666 | Forkhead box O1A (rhabdomyosarcoma)                                          | FOXO1A  | 1.47  | 13q14.1        |
| Hs.59757  | Zinc finger protein 281                                                      | ZNF281  | 1.45  | 1q32.1         |
| Hs.590886 | Retinoid X receptor, alpha                                                   | RXRA    | 1.44  | 9q34.3         |
| Hs.57687  | Four and a half LIM domains 3                                                | FHL3    | 1.44  | 1p34           |
| Hs.435369 | Four and a half LIM domains 1                                                | FHL1    | 1.44  | Xq26           |
| Hs.167700 | SMAD, mothers against DPP homolog 5                                          | SMAD5   | -1.40 | 5q31           |
| Hs.481852 | General transcription factor IIB                                             | GTF2B   | -1.41 | 1p22-p21       |
| Hs.280741 | Yip1 interacting factor homolog B                                            | YIF1B   | -1.42 | 19q13.2        |
| Hs.258855 | Myeloid/lymphoid or mixed-lineage leukemia                                   | MLL     | -1.43 | 11q23          |
| Hs.157883 | Zinc finger protein 187                                                      | ZNF187  | -1.47 | 6p21.31        |
| Hs.202247 | Orthopedia homolog (Drosophila)                                              | OTP     | -1.47 | 5q13.3         |
| Hs.509964 | Basic leucine zipper transcription factor, ATF-like                          | BATF    | -1.50 | 14q24.3        |
| Hs.516922 | NK2 transcription factor related, locus 2 (Drosophila)                       | NKX2-2  | -1.50 | 20pter-q11.23  |
| Hs.444414 | AF4/FMR2 family, member 3                                                    | AFF3    | -1.51 | 2q11.2-q12     |
| Hs.114246 | Zinc finger protein 81 (HFZ20)                                               | ZNF81   | -1.54 | Xp11.23        |
| Hs.534460 | Nuclear factor of activated T-cells, cytoplasmic, calcineurin-dependent 3    | NFATC3  | -1.55 | 16q22.2        |
| Hs.435730 | Iroquois homeobox protein 5                                                  | IRX5    | -1.55 | 16q11.2-q13    |
| Hs.546282 | Retinoblastoma binding protein 8                                             | RBBP8   | -1.56 | 18q11.2        |
| Hs.257970 | Nuclear factor I/X (CCAAT-binding transcription factor)                      | NFIX    | -1.60 | 19p13.3        |
| Hs.1545   | Caudal type homeo box transcription factor 1                                 | CDX1    | -1.61 | 5q31-q33       |
| Hs.445534 | Period homolog 1 (Drosophila)                                                | PER1    | -1.66 | 17p13.1-17p12  |
| Hs.168586 | T-cell leukemia, homeobox 2                                                  | TLX2    | -1.68 | 2p13.1-p12     |
| Hs.584806 | Transcription elongation factor B (SIII), polypeptide 3 (110kDa, elongin A)  | TCEB3   | -1.73 | 1p36.1         |
| Hs.184080 | Zinc finger protein 138 (clone pHZ-32)                                       | ZNF138  | -1.78 | 7q11.21-q11.23 |
| Hs.535297 | AT rich interactive domain 5B (MRF1-like)                                    | ARID5B  | -1.79 | 10q21.2        |
| Hs.15725  | Immediate early response 5                                                   | IER5    | -1.85 | 1q25.3         |
| Hs.564295 | Zinc finger protein 549                                                      | ZNF549  | -1.85 | 19q13.43       |
| Hs.25960  | V-myc myelocytomatosis viral related oncogene, neuroblastoma derived (avian) | MYCN    | -1.89 | 2p24.1         |
| Hs.591091 | Paired box gene 5 (B-cell lineage specific activator)                        | PAX5    | -1.96 | 9p13           |
| Hs.591337 | V-myb myeloblastosis viral oncogene homolog (avian)                          | MYB     | -2.21 | 6q22-q23       |

#### ***DNA associated proteins***

|           |                                                          |               |       |          |
|-----------|----------------------------------------------------------|---------------|-------|----------|
| Hs.475733 | Topoisomerase (DNA) II beta 180kDa                       | TOP2B         | -1.45 | 3p24     |
| Hs.128258 | Proliferation-inducing protein 38                        | RP11-301I17.1 | -1.46 | 13q14.11 |
| Hs.192649 | MRE11 meiotic recombination 11 homolog A (S. cerevisiae) | MRE11A        | -1.47 | 11q21    |
| Hs.374043 | Additional sex combs like 1 (Drosophila)                 | ASXL1         | -1.52 | 20q11.1  |
| Hs.535191 | Postmeiotic segregation increased 2-like 4               | PMS2L4        | -1.62 | 7q11-q22 |

|           |                              |           |       |            |
|-----------|------------------------------|-----------|-------|------------|
| Hs.440049 | ZXD family zinc finger C     | ZXDC      | -1.71 | 3q21.2     |
| Hs.436401 | Topoisomerase (DNA) III beta | TOP3B     | -1.78 | 22q11.22   |
| Hs.233568 | Histone 1, H2a1              | HIST1H2AL | -1.88 | 6p22-p21.3 |

### **Translation**

#### ***RNA transport and processing***

|           |                                                               |        |       |           |
|-----------|---------------------------------------------------------------|--------|-------|-----------|
| Hs.478000 | Muscleblind-like (Drosophila)                                 | MBNL1  | 1.46  | 3q25      |
| Hs.96996  | Heterogeneous nuclear ribonucleoprotein A0                    | HNRPA0 | 1.42  | 5q31      |
| Hs.387471 | Poly(A) polymerase gamma                                      | PAPOLG | -1.41 | 2p16.1    |
| Hs.523739 | Nuclear RNA export factor 1                                   | NXF1   | -1.42 | 11q12-q13 |
| Hs.516075 | TIA1 cytotoxic granule-associated RNA binding protein         | TIA1   | -1.44 | 2p13      |
| Hs.591619 | Nucleoporin-like protein RIP                                  | HRB    | -1.51 | 2q36.3    |
| Hs.499643 | Apobec-1 complementation factor                               | ACF    | -1.55 | 10q11.23  |
| Hs.190520 | LSM6 homolog, U6 small nuclear RNA associated (S. cerevisiae) | LSM6   | -1.61 | 4q31.22   |

#### ***Translation and post-translational modifications***

|           |                                                                            |         |       |              |
|-----------|----------------------------------------------------------------------------|---------|-------|--------------|
| Hs.401954 | Transmembrane and tetratricopeptide repeat containing 1                    | TMTC1   | 1.49  | 12p11.22     |
| Hs.297304 | Glycosyltransferase 8 domain containing 1                                  | GLT8D1  | 1.48  | 3p21.1       |
| Hs.400295 | Ribosomal protein L30                                                      | RPL30   | 1.41  | 8q22         |
| Hs.370504 | Ribosomal protein S15a                                                     | RPS15A  | 1.40  | 16p          |
| Hs.501239 | Arginyltransferase 1                                                       | ATE1    | -1.40 | 10q26.13     |
| Hs.444389 | Lysyl oxidase-like 2                                                       | LOXL2   | -1.41 | 8p21.3-p21.2 |
| Hs.34180  | UDP-glucose ceramide glucosyltransferase-like 1                            | UGCGL1  | -1.41 | 2q14.3       |
| Hs.301898 | Dolichyl-phosphate mannosyltransferase polypeptide 1, catalytic subunit    | DPM1    | -1.47 | 20q13.13     |
| Hs.481860 | Threonyl-tRNA synthetase                                                   | TARS    | -1.44 | 5p13.2       |
| Hs.477498 | Eukaryotic elongation factor, selenocysteine-tRNA-specific                 | EEFSEC  | -1.51 | 3q21.3       |
| Hs.78854  | Mannose-P-dolichol utilization defect 1                                    | MPDU1   | -1.65 | 17p13.1-p12  |
| Hs.193226 | UDP-glucose ceramide glucosyltransferase-like 2                            | UGCGL2  | -1.67 | 13q32.1      |
| Hs.592200 | Mannosyl (beta-1,4-)-glycoprotein beta-1,4-N-acetylglucosaminyltransferase | MGAT3   | -1.87 | 22q13.1      |
| Hs.531642 | Phosphatidylinositol N-acetylglucosaminyltransferase GPI1 subunit          | PIGQ    | -1.91 | 16p13.3      |
| Hs.131431 | Eukaryotic translation initiation factor 2-alpha kinase 2                  | EIF2AK2 | -1.93 | 2p22-p21     |

### **Protein catabolism**

#### ***Ubiquitin-proteasome pathway***

|           |                                                   |       |       |              |
|-----------|---------------------------------------------------|-------|-------|--------------|
| Hs.591319 | Ubiquitin specific protease 13 (isopeptidase T-3) | USP13 | 1.63  | 3q26.2-q26.3 |
| Hs.584916 | Ring finger protein 43                            | RNF43 | -1.41 | 17q22        |
| Hs.546407 | Cullin-associated and neddylation-dissociated 1   | CAND1 | -1.59 | 12q14        |

#### ***Proteases and protease inhibitors***

|           |                                               |         |       |          |
|-----------|-----------------------------------------------|---------|-------|----------|
| Hs.78977  | Proprotein convertase subtilisin/kexin type 1 | PCSK1   | -1.42 | 5q15-q21 |
| Hs.591033 | Matrix metalloproteinase 19                   | MMP19   | -1.47 | 12q14    |
| Hs.436564 | Prolyl endopeptidase                          | PREP    | -1.47 | 6q22     |
| Hs.75285  | Inter-alpha (globulin) inhibitor H2           | ITIH2   | -1.51 | 10p15    |
| Hs.558371 | Reelin                                        | RELN    | -1.53 | 7q22     |
| Hs.592083 | Crm, cramped-like (Drosophila)                | CRAMP1L | -1.55 | 16p13.3  |
| Hs.75262  | Cathepsin O                                   | CTSO    | -1.57 | 4q31-q32 |
| Hs.445857 | Protease, serine, 12 (neurotrypsin, motopsin) | PRSS12  | -1.78 | 4q28.1   |

### **Others and proteins with unknown function**

|           |                                                       |          |       |              |
|-----------|-------------------------------------------------------|----------|-------|--------------|
| Hs.432132 | Putative lymphocyte G0/G1 switch gene                 | G0S2     | 2.84  | 1q32.2-q41   |
| Hs.475353 | LIM and cysteine-rich domains 1                       | LMCD1    | 1.58  | 3p26-p24     |
| Hs.111801 | Arsenate resistance protein ARS2                      | ARS2     | 1.42  | 7q21         |
| Hs.104476 | Transmembrane protein 125                             | TMEM125  | -1.40 | 1p34.2       |
| Hs.104672 | Downregulated in ovarian cancer 1                     | DOC1     | -1.42 | 3q12.1       |
| Hs.541894 | Ankyrin repeat domain 36                              | ANKRD36  | -1.42 | 2q11.2       |
| Hs.427232 | Vitamin K epoxide reductase complex, subunit 1-like 1 | VKORC1L1 | -1.42 | 7q11.21      |
| Hs.448664 | Transmembrane protein 80                              | TMEM80   | -1.43 | 11p15.5      |
| Hs.178703 | Mast cell-expressed membrane protein 1                | MCEMP1   | -1.44 | 19p13.2      |
| Hs.152913 | Endomucin                                             | EMCN     | -1.44 | 4q24         |
| Hs.585433 | Kin of IRRE like (Drosophila)                         | KIRREL   | -1.46 | 1q21-q25     |
| Hs.167741 | Butyrophilin, subfamily 3, member A3                  | BTN3A3   | -1.47 | 6p21.3       |
| Hs.298851 | Male sterility domain containing 1                    | MLSTD1   | -1.47 | 12p11.22     |
| Hs.224008 | Fasciculation and elongation protein zeta 1 (zygin I) | FEZ1     | -1.49 | 11q24.2      |
| Hs.585839 | Family with sequence similarity 38, member B          | FAM38B   | -1.51 | 18p11.22     |
| Hs.165736 | WD repeat domain 73                                   | WDR73    | -1.53 | 15q25.2      |
| Hs.141308 | Myelin oligodendrocyte glycoprotein                   | MOG      | -1.59 | 6p22.1       |
| Hs.71040  | Family with sequence similarity 32, member A          | FAM32A   | -1.63 | 19pter-p13.3 |
| Hs.170904 | Growth hormone regulated TBC protein 1                | GRTP1    | -1.63 | 13q34        |
| Hs.497369 | Neuron navigator 1                                    | NAV1     | -1.64 |              |
| Hs.91566  | Transmembrane protein 115                             | TMEM115  | -1.65 | 3p21.3       |
| Hs.496459 | Torsin A interacting protein 1                        | TOR1AIP1 | -1.65 | 1q24.2       |
| Hs.169222 | Acrosomal vesicle protein 1                           | ACRV1    | -1.74 | 11p12-q13    |
| Hs.509780 | WD repeat domain 22                                   | WDR22    | -1.75 | 14q23-q24.1  |
| Hs.570737 | Translocation associated membrane protein 1-like 1    | TRAM1L1  | -1.79 | 4q26         |
| Hs.187459 | Zinc finger, DHHC domain containing 14                | ZDHHC14  | -1.90 | 6q25.3       |
| Hs.567612 | Major facilitator superfamily domain containing 7     | MFSD7    | -2.10 | 4p16.3       |
| Hs.506663 | Huntingtin interacting protein E                      | HYPE     | -2.26 | 12q24.1      |

**Hypothetical proteins and EST**

|           |                                         |           |       |          |
|-----------|-----------------------------------------|-----------|-------|----------|
| Hs.591954 | Hypothetical protein LOC283130          | LOC283130 | 2.23  | 11q13.1  |
| Hs.536218 | Transcribed locus                       |           | 1.93  |          |
| Hs.591724 | Transcribed locus                       |           | 1.60  | 5q35.3   |
| Hs.374257 | Hypothetical protein LOC286167          | LOC286167 | 1.59  | 8q24.22  |
| Hs.586722 | Transcribed locus                       |           | 1.40  |          |
| Hs.460807 | Chromosome 20 open reading frame 117    | C20orf117 | 1.40  | 20q11.23 |
| Hs.25422  | Clone 24527 mRNA sequence               |           | -1.40 |          |
| Hs.572260 | Transcribed locus                       |           | -1.41 |          |
| Hs.194392 | hypothetical protein                    | LOC147991 | -1.41 | 19q13.11 |
| Hs.160063 | FLJ16124 protein                        | FLJ16124  | -1.42 | 2p14     |
| Hs.303669 | Hypothetical protein MGC26694           | MGC26694  | -1.42 | 19p13.11 |
| Hs.166551 | Chromosome 5 open reading frame 3       | C5orf3    | -1.43 | 5q31-q33 |
| Hs.82921  | Chromosome 6 open reading frame 165     | C6orf165  | -1.43 | 6q15     |
| Hs.4988   | Hypothetical protein LOC151162          | LOC151162 | -1.44 | 2q21.3   |
| Hs.352541 | Chromosome 15 open reading frame 40     | C15orf40  | -1.45 | 15q25.2  |
| Hs.119993 | Transcribed locus                       |           | -1.45 |          |
| Hs.600665 | Transcribed locus                       |           | -1.45 |          |
| Hs.480055 | Hypothetical protein MGC10646           | MGC10646  | -1.45 | 4q21.21  |
| Hs.317190 | hypothetical protein H17                |           | -1.45 | 11q24.2  |
| Hs.600492 | Transcribed locus                       |           | -1.45 |          |
| Hs.597407 | Transcribed locus                       |           | -1.45 |          |
| Hs.604384 | Transcribed locus                       |           | -1.46 |          |
| Hs.432401 | Transcribed locus                       |           | -1.46 |          |
| Hs.26580  | Transcribed locus                       |           | -1.46 |          |
| Hs.8429   | Transcribed locus                       |           | -1.46 |          |
| Hs.530069 | Transcribed locus                       |           | -1.46 |          |
| Hs.404323 | Transcribed locus                       |           | -1.47 |          |
| Hs.192711 | Hypothetical gene supported by AK055887 | LOC441179 | -1.47 | 6q27     |
| Hs.567379 | chromosome 17 open reading frame 35     |           | -1.49 | 17p11.2  |
| Hs.594218 | Transcribed locus                       |           | -1.49 |          |
| Hs.545117 | Transcribed locus                       |           | -1.51 |          |
| Hs.115140 | Hypothetical BC331191_1                 | LOC163131 | -1.51 | 19q13.2  |
| Hs.502585 | Transcribed locus]                      |           | -1.52 |          |
| Hs.6224   | KIAA0895 protein                        | KIAA0895  | -1.52 | 7p14.2   |
| Hs.520785 | Hypothetical protein FLJ12700           | FLJ12700  | -1.53 | 7q36.1   |
| Hs.9003   | Chromosome 16 open reading frame 58     | C16orf58  | -1.53 | 16p11.2  |
| Hs.592376 | Full-length cDNA clone CS0DC009YH03     |           | -1.55 |          |
| Hs.61587  | Transcribed locus                       |           | -1.55 |          |
| Hs.599547 | Transcribed locus                       |           | -1.58 |          |
| Hs.205572 | KIAA0922 protein                        | KIAA0922  | -1.59 | 4q31.3   |
| Hs.126566 | Transcribed locus                       |           | -1.60 |          |
| Hs.597340 | Transcribed locus                       |           | -1.60 |          |
| Hs.97714  | Hypothetical protein FLJ40243           | FLJ40243  | -1.61 | 5p13.1   |
| Hs.529860 | Hypothetical gene supported by AK024177 |           | -1.61 | 9q34.11  |
| Hs.262868 | Transcribed locus                       |           | -1.61 |          |
| Hs.429119 | Hypothetical protein LOC285043          | LOC285043 | -1.62 | 2p23.3   |
| Hs.481936 | Hypothetical protein FLJ13231           | FLJ13231  | -1.63 | 5p13.2   |
| Hs.229128 | Transcribed locus                       |           | -1.63 |          |
| Hs.592779 | Transcribed locus                       |           | -1.63 |          |
| Hs.490512 | Hypothetical protein LOC155060          | LOC155060 | -1.65 | 7q36.1   |
| Hs.597567 | Full-length cDNA clone CS0DK005YO12     |           | -1.65 |          |
| Hs.577789 | Transcribed locus                       |           | -1.66 |          |
| Hs.460217 | Hypothetical protein MGC35048           | MGC35048  | -1.66 | 16p12.3  |
| Hs.48803  | Transcribed locus                       |           | -1.69 |          |
| Hs.143821 | Transcribed locus                       |           | -1.72 |          |
| Hs.445885 | KIAA1217                                | KIAA1217  | -1.72 | 10p12.1  |
| Hs.471393 | Transcribed locus                       |           | -1.76 |          |
| Hs.124627 | Transcribed locus                       |           | -1.77 |          |
| Hs.134846 | Hypothetical protein MGC24381           | MGC24381  | -1.80 | 16p13.3  |
| Hs.533644 | hypothetical protein FLJ32949           | FLJ32949  | -1.88 | 12q14.2  |
| Hs.592254 | Chromosome Y open reading frame 15B     | CYorf15B  | -1.88 | Yq11.222 |
| Hs.57870  | Transcribed locus                       |           | -1.92 |          |
| Hs.390738 | Hypothetical protein FLJ20366           | FLJ20366  | -1.96 | 8q23.2   |
| Hs.37982  | Transcribed locus,                      |           | -2.34 |          |
