# Supplementary material
Source: HighWire-hosted journal article supplement (https://diabetes.diabetesjournals.org/content/suppl/2007/01/19/db06-1242)
Supplement: db06-1242_Supplementary_Table_2.pdf [file db06-1242_Supplementary_Table_2.pdf]

**Table 2 : List of the 336 genes regulated in human adipose tissue during 3 hours hyperglycemic clamp**

| UGCluster                                              | Name                                                                             | Symbol        | Fold Change | Cytoband      |
|--------------------------------------------------------|----------------------------------------------------------------------------------|---------------|-------------|---------------|
| <b><u>Response to stress</u></b>                       |                                                                                  |               |             |               |
| Hs.322430                                              | NDRG family member 4                                                             | NDRG4         | 1.41        | 16q21-q22.1   |
| Hs.9613                                                | Angiopoietin-like 4                                                              | ANGPTL4       | -1.46       | 19p13.3       |
| Hs.274363                                              | Neuroglobin                                                                      | NGB           | -1.47       | 14q24         |
| Hs.433213                                              | Hypoxia-inducible protein 2                                                      | HIG2          | -1.48       | 7q32.1        |
| Hs.150837                                              | Thioredoxin domain containing 5                                                  | TXNDC5        | -1.52       | 6p24.3        |
| Hs.523836                                              | Glutathione S-transferase pi                                                     | GSTP1         | -1.54       | 11q13         |
| Hs.523012                                              | DNA-damage-inducible transcript 4                                                | DDIT4         | -1.96       | 10pter-q26.12 |
| <b><u>Immune response, cytokines &amp; related</u></b> |                                                                                  |               |             |               |
| Hs.478275                                              | Tumor necrosis factor (ligand) superfamily, member 10                            | TNFSF10       | 1.41        | 3q26          |
| Hs.2164                                                | Pro-platelet basic protein (chemokine (C-X-C motif) ligand 7)                    | PPBP          | 1.41        | 4q12-q13      |
| Hs.375108                                              | CD24 molecule                                                                    | CD24          | 1.41        | 6q21          |
| Hs.534322                                              | Major histocompatibility complex, class II, DR beta 1                            | HLA-DRB1      | 1.41        | 6p21.3        |
| Hs.278391                                              | Toll-like receptor adaptor molecule 2                                            | TICAM2        | 1.40        | 5q23.1        |
| Hs.579550                                              | Deleted in colorectal carcinoma                                                  | DCC           | -1.47       | 18q21.3       |
| Hs.232543                                              | Programmed cell death 4 (neoplastic transformation inhibitor)                    | PDCD4         | -1.49       | 10q24         |
| Hs.499674                                              | Mannose-binding lectin (protein C) 2, soluble                                    | MBL2          | -1.81       | 10q11.2-q21   |
| Hs.80395                                               | Mal, T-cell differentiation protein                                              | MAL           | -1.89       | 2cen-q13      |
| Hs.583348                                              | Inhibin, beta A (activin A, activin AB alpha polypeptide)                        | INHBA         | -2.07       | 7p15-p13      |
| Hs.522572                                              | B-lymphocyte antigen precursor                                                   | RP13-297E16.1 | -2.52       | Xp22.32       |
| Hs.276925                                              | GTP binding protein 1                                                            | GTPBP1        | -2.24       | 22q13.1       |
| <b><u>Circulating active peptides</u></b>              |                                                                                  |               |             |               |
| Hs.432400                                              | Agouti signaling protein, nonagouti homolog (mouse)                              | ASIP          | -1.42       | 20q11.2-q12   |
| Hs.160562                                              | Insulin-like growth factor 1 (somatomedin C)                                     | IGF1          | -1.45       | 12q22-q23     |
| Hs.441047                                              | Adrenomedullin                                                                   | ADM           | -1.45       | 11p15.4       |
| Hs.11103                                               | Transforming growth factor, beta 1                                               | TGFB1         | -1.49       | 19q13.2       |
| Hs.156979                                              | Interleukin 17B                                                                  | IL17B         | -2.05       | 5q32-34       |
| Hs.2561                                                | Nerve growth factor, beta polypeptide                                            | NGFB          | -2.46       | 1p13.1        |
| <b><u>Receptors</u></b>                                |                                                                                  |               |             |               |
| Hs.369592                                              | Thyroid adenoma associated                                                       | THADA         | 1.46        | 2p21          |
| Hs.525666                                              | Olfactory receptor, family 4, subfamily N, member 4                              | OR4N4         | 1.42        | 15q11.2       |
| Hs.52931                                               | Adrenergic, alpha-1A-, receptor                                                  | ADRA1A        | 1.40        | 8p21-p11.2    |
| Hs.101480                                              | AP1 gamma subunit binding protein 1                                              | AP1GBP1       | -1.42       | 17q12         |
| Hs.155048                                              | Basal cell adhesion molecule (Lutheran blood group)                              | BCAM          | -1.43       | 19q13.2       |
| Hs.438311                                              | Angiotensin II receptor-like 1                                                   | AGTRL1        | -1.53       | 11q12         |
| Hs.72550                                               | Hyaluronan-mediated motility receptor (RHAMM)                                    | HMMR          | -1.55       | 5q33.2-qter   |
| Hs.171844                                              | Poliovirus receptor                                                              | PVR           | -1.60       | 19q13.2       |
| Hs.525105                                              | SLIT and NTRK-like family, member 6                                              | SLITRK6       | -1.68       | 13q31.1       |
| Hs.515061                                              | Endothelial differentiation, lysophosphatidic acid G-protein-coupled receptor, 6 | EDG6          | -1.76       | 19p13.3       |
| Hs.109514                                              | Ryanodine receptor 2 (cardiac)                                                   | RYR2          | -1.77       | 1q42.1-q43    |
| Hs.178066                                              | Membrane-spanning 4-domains, subfamily A, member 5                               | MS4A5         | -1.78       | 11q12         |
| <b><u>Signaling pathways</u></b>                       |                                                                                  |               |             |               |
| <b><u>Protein phosphatases</u></b>                     |                                                                                  |               |             |               |
| Hs.19281                                               | Protein tyrosine phosphatase, non-receptor type 14                               | PTPN14        | -1.44       | 1q32.2        |
| Hs.291000                                              | Protein phosphatase 1K (PP2C domain containing)                                  | PPM1K         | -1.46       | 4q22.1        |
| Hs.584790                                              | Protein phosphatase 2 (formerly 2A), regulatory subunit A (PR 65), beta isoform  | PPP2R1B       | -1.60       | 11q23.2       |
| Hs.106019                                              | Protein phosphatase 1, regulatory subunit 10                                     | PPP1R10       | -1.62       | 6p21.3        |
| Hs.148340                                              | Protein tyrosine phosphatase, receptor type, G                                   | PTPRG         | -1.87       | 3p21-p14      |
| <b><u>Protein kinases</u></b>                          |                                                                                  |               |             |               |
| Hs.164267                                              | Dual-specificity tyrosine-(Y)-phosphorylation regulated kinase 3                 | DYRK3         | 1.46        | 1q32.1        |
| Hs.7200                                                | NIMA (never in mitosis gene a)- related kinase 9                                 | NEK9          | -1.45       | 14q24.3       |
| Hs.36566                                               | LIM domain kinase 1                                                              | LIMK1         | -1.47       | 7q11.23       |
| Hs.431550                                              | Mitogen-activated protein kinase kinase kinase kinase 4                          | MAP4K4        | -1.49       | 2q11.2-q12    |
| Hs.291623                                              | TAO kinase 2                                                                     | TAOK2         | -1.63       | 16p11.2       |
| Hs.468878                                              | AP2 associated kinase 1                                                          | AAK1          | -1.63       | 2p24.3-p14    |
| Hs.531704                                              | Protein kinase C, alpha                                                          | PRKCA         | -1.67       | 17q22-q23.2   |
| Hs.234521                                              | Mitogen-activated protein kinase-activated protein kinase 3                      | MAPKAPK3      | -1.73       | 3p21.3        |
| Hs.133534                                              | Kinase suppressor of ras 1                                                       | KSR1          | -1.85       | 17q11.1       |
| Hs.495984                                              | Calcium/calmodulin-dependent serine protein kinase (MAGUK family)                | CASK          | -2.16       | Xp11.4        |
| Hs.478199                                              | Protein kinase C, iota                                                           | PRKCI         | -2.28       | 3q26.3        |
| Hs.541273                                              | V-akt murine thymoma viral oncogene homolog 2                                    | AKT2          | -2.46       | 19q13.1-q13.2 |
| Hs.495731                                              | BMX non-receptor tyrosine kinase                                                 | BMX           | -2.53       | Xp22.2        |
| Hs.466743                                              | Mitogen-activated protein kinase kinase kinase 10                                | MAP3K10       | -3.06       | 19q13.2       |

**cAMP Pathway**

|           |                                                      |        |       |            |
|-----------|------------------------------------------------------|--------|-------|------------|
| Hs.194350 | Protein kinase, cAMP-dependent, catalytic, alpha     | PRKACA | -1.34 | 19p13.1    |
| Hs.129493 | Adenylate cyclase 5                                  | ADCY5  | -1.43 | 3q13.2-q21 |
| Hs.572993 | 2'-phosphodiesterase                                 | 2'-PDE | -1.46 | 3p14.3     |
| Hs.132902 | CAP, adenylate cyclase-associated protein, 2 (yeast) | CAP2   | -1.47 | 6p22.3     |
| Hs.486483 | A kinase (PRKA) anchor protein 7                     | AKAP7  | -1.48 | 6q23       |
| Hs.170839 | Phospholamban                                        | PLN    | -1.61 | 6q22.1     |

#### **Others signaling pathways**

|           |                                                                               |          |       |               |
|-----------|-------------------------------------------------------------------------------|----------|-------|---------------|
| Hs.6136   | Rho GTPase activating protein 20                                              | ARHGAP20 | 1.47  | 11q22.3-q23.1 |
| Hs.233495 | Pleckstrin homology domain containing, family A member 8                      | PLEKHA8  | 1.45  | 7p21-p11.2    |
| Hs.125293 | RasGEF domain family, member 1A                                               | RASGEF1A | 1.41  | 10q11.21      |
| Hs.535257 | Centaurin, beta 5                                                             | CENTB5   | -1.41 |               |
| Hs.778    | Guanylate cyclase activator 2A (guanylin)                                     | GUCA2A   | -1.41 | 1p35-p34      |
| Hs.469593 | LIM and senescent cell antigen-like domains 1                                 | LIMS1    | -1.42 | 2q12.3-q13    |
| Hs.477142 | Phosphatidic acid phosphatase type 2B                                         | PPAP2B   | -1.43 | 1pter-p22.1   |
| Hs.121593 | Centaurin, alpha 1                                                            | CENTA1   | -1.43 | 7p22.3        |
| Hs.465506 | Phosphatidic acid phosphatase type 2C                                         | PPAP2C   | -1.43 | 19p13         |
| Hs.531752 | RAN binding protein 3                                                         | RANBP3   | -1.43 | 19p13.3       |
| Hs.303208 | SH2 domain containing 4A                                                      | SH2D4A   | -1.46 | 8p21.2        |
| Hs.442344 | Insulin receptor substrate 2                                                  | IRS2     | -1.48 | 13q34         |
| Hs.225356 | CDC42 effector protein (Rho GTPase binding) 1                                 | CDC42EP1 | -1.49 | 22q13.1       |
| Hs.32966  | Guanylate cyclase activator 2B (uroguanylin)                                  | GUCA2B   | -1.52 | 1p34-p33      |
| Hs.302435 | Centaurin, gamma 1                                                            | CENTG1   | -1.54 | 12q14.1       |
| Hs.522378 | DAB2 interacting protein                                                      | DAB2IP   | -1.57 | 9q33.1-q33.3  |
| Hs.50640  | Suppressor of cytokine signaling 1                                            | SOCS1    | -1.60 | 16p13.13      |
| Hs.1116   | Pleckstrin homology domain containing, family G (with RhoGef domain) member 6 | PLEKHG6  | -1.78 | 12p13.31      |
| Hs.189781 | Pleckstrin homology domain containing, family G (with RhoGef domain) member 1 | PLEKHG1  | -1.82 | 6q25.1        |
| Hs.515469 | Vasodilator-stimulated phosphoprotein                                         | VASP     | -1.91 | 19q13.2-q13.3 |
| Hs.368808 | EH-domain containing 3                                                        | EHD3     | -1.92 | 2p21          |
| Hs.133044 | Raptor                                                                        | raptor   | -2.10 | 17q25.3       |
| Hs.435019 | Neurexophilin 2                                                               | NXP2     | -2.21 | 2q22.1        |
| Hs.521482 | Src homology 2 domain containing adaptor protein B                            | SHB      | -2.25 | 9p12-p11      |

#### **Enzymes**

##### **Carbohydrate metabolism**

|           |                                                                                     |        |       |               |
|-----------|-------------------------------------------------------------------------------------|--------|-------|---------------|
| Hs.591588 | Hexokinase 2                                                                        | HK2    | 1.65  | 2p13          |
| Hs.26010  | Phosphofructokinase, platelet                                                       | PFKP   | 1.40  | 10p15.3-p15.2 |
| Hs.154084 | Phosphorylase, glycogen; muscle (McArdle syndrome, glycogen storage disease type V) | PYGM   | -1.40 | 11q12-q13.2   |
| Hs.411695 | Hexokinase 3 (white cell)                                                           | HK3    | -1.70 | 5q35.2        |
| Hs.8364   | Pyruvate dehydrogenase kinase, isozyme 4                                            | PKD4   | -2.17 | 7q21.3-q22.1  |
| Hs.195471 | 6-phosphofructo-2-kinase/fructose-2,6-biphosphatase 3                               | PFKFB3 | -2.23 | 10p14-p15     |
| Hs.590891 | Phosphoglucomutase 3                                                                | PGM3   | -2.69 | 6q14.1-q15    |

##### **Lipid metabolism**

|           |                                                                                              |         |       |           |
|-----------|----------------------------------------------------------------------------------------------|---------|-------|-----------|
| Hs.122038 | Acyl-CoA thioesterase 6                                                                      | ACOT6   | 1.46  | 14q24.3   |
| Hs.128598 | 3-hydroxyisobutyryl-Coenzyme A hydrolase                                                     | HIBCH   | 1.41  | 2q32.2    |
| Hs.303980 | Cytochrome P450, family 11, subfamily A, polypeptide 1                                       | CYP11A1 | -1.45 | 15q23-q24 |
| Hs.320151 | 1-acylglycerol-3-phosphate O-acyltransferase 2 (lysophosphatidic acid acyltransferase, beta) | AGPAT2  | -1.49 | 9q34.3    |
| Hs.50727  | Hydroxysteroid (17-beta) dehydrogenase 1                                                     | HSD17B1 | -1.51 | 17q11-q21 |
| Hs.364941 | Hydroxy-delta-5-steroid dehydrogenase, 3 beta- and steroid delta-isomerase 1                 | HSD3B1  | -1.65 | 1p13.1    |

##### **ATPase**

|           |                                                                               |        |       |          |
|-----------|-------------------------------------------------------------------------------|--------|-------|----------|
| Hs.34114  | ATPase, Na <sup>+</sup> /K <sup>+</sup> transporting, alpha 2 (+) polypeptide | ATP1A2 | 1.58  | 1q21-q23 |
| Hs.370834 | ATPase family, AAA domain containing 2                                        | ATAD2  | 1.43  | 8q24.13  |
| Hs.306212 | ATPase, Class I, type 8B, member 3                                            | ATP8B3 | -1.90 | 19p13.3  |

##### **Others enzymes**

|           |                                                                     |         |       |            |
|-----------|---------------------------------------------------------------------|---------|-------|------------|
| Hs.67201  | 5', 3'-nucleotidase, cytosolic                                      | NT5C    | 1.48  | 17q25.1    |
| Hs.524579 | Lysozyme (renal amyloidosis)                                        | LYZ     | 1.48  | 12q15      |
| Hs.104347 | 2-amino adipic 6-semialdehyde dehydrogenase                         | AASDH   | 1.43  | 4q12       |
| Hs.284491 | Pyridoxal (pyridoxine, vitamin B6) kinase                           | PDXK    | 1.42  | 21q22.3    |
| Hs.75372  | N-acetylgalactosaminidase, alpha-                                   | NAGA    | -1.47 | 22q13-qter |
| Hs.500750 | Heparanase 2                                                        | HPSE2   | -1.49 | 10q23-q24  |
| Hs.567342 | Sulfotransferase family, cytosolic, 1A, phenol-preferring, member 1 | SULT1A1 | -1.49 | 16p12.1    |
| Hs.512181 | Spermidine/spermine N1-acetyl transferase-like 1                    | SATL1   | -1.57 | Xq21.1     |
| Hs.458332 | Proline-5-carboxylate reductase 1                                   | PYCR1   | -1.81 | 17q25.3    |
| Hs.369762 | Enolase superfamily member 1                                        | ENOSF1  | -1.88 | 18p11.32   |
| Hs.431417 | Arylalkylamine N-acetyltransferase                                  | AANAT   | -2.30 | 17q25      |
| Hs.463466 | Carbonic anhydrase X                                                | CA10    | -2.32 | 17q21      |
| Hs.159525 | Cell growth regulator with EF-hand domain 1                         | CGREF1  | -2.62 | 2p23.3     |

#### **Structural proteins & cytoskeleton**

|           |                                                                                   |           |       |            |
|-----------|-----------------------------------------------------------------------------------|-----------|-------|------------|
| Hs.520554 | Tubulin tyrosine ligase-like family, member 2                                     | TLL2      | 1.48  | 6q27       |
| Hs.60480  | Keratin associated protein 19-3                                                   | KRTAP19-3 | 1.45  | 21q22.1    |
| Hs.407580 | Plakophilin 4                                                                     | PKP4      | -1.42 | 2q23-q31   |
| Hs.2785   | Keratin 17                                                                        | KRT17     | -1.43 | 17q12-q21  |
| Hs.418012 | Collagen, type IX, alpha 2                                                        | COL9A2    | -1.46 | 1p33-p32   |
| Hs.497350 | Plakophilin 1 (ectodermal dysplasia/skin fragility syndrome)                      | PKP1      | -1.47 | 1q32       |
| Hs.432390 | Dynein, axonemal, heavy polypeptide 11                                            | DNAH11    | -1.51 | 7p21       |
| Hs.534797 | Catenin (cadherin-associated protein), alpha 1, 102kDa                            | CTNNA1    | -1.57 | 5q31       |
| Hs.1076   | Small proline-rich protein 1B (cornifin)                                          | SPRR1B    | -1.57 | 1q21-q22   |
| Hs.381181 | Coiled-coil domain containing 96                                                  | CCDC96    | -1.60 | 4p16.1     |
| Hs.125133 | Hermansky-Pudlak syndrome 6                                                       | HPS6      | -1.61 | 10q24.32   |
| Hs.118555 | Fascin homolog 2, actin-bundling protein, retinal (Strongylocentrotus purpuratus) | FSCN2     | -1.63 | 17q25      |
| Hs.25640  | Claudin 3                                                                         | CLDN3     | -1.67 | 7q11.23    |
| Hs.487036 | Myosin VC                                                                         | MYO5C     | -1.67 | 15q21      |
| Hs.501928 | Microtubule associated monooxygenase, calponin and LIM domain containing 2        | MICAL2    | -1.67 | 11p15.3    |
| Hs.446867 | Formin 1                                                                          | FMN1      | -1.69 | 15q13.3    |
| Hs.34780  | Doublecortin; lissencephaly, X-linked (doublecortin)                              | DCX       | -1.70 | Xq22.3-q23 |
| Hs.499745 | Myosin, heavy polypeptide 2, skeletal muscle, adult                               | MYH2      | -1.71 | 17p13.1    |
| Hs.513915 | Claudin 7                                                                         | CLDN7     | -1.71 | 17p13      |
| Hs.201805 | Laminin, gamma 3                                                                  | LAMC3     | -1.82 | 9q31-q34   |
| Hs.93534  | Syntaxin binding protein 5 (tomosyn)                                              | STXBP5    | -1.99 | 6q24.3     |
| Hs.368281 | Microtubule-associated protein 2                                                  | MAP2      | -2.02 | 2q34-q35   |
| Hs.86492  | Small muscle protein, X-linked                                                    | SMPX      | -2.31 | Xp22.1     |

### **Transporters & carriers**

|           |                                                                                |          |       |                 |
|-----------|--------------------------------------------------------------------------------|----------|-------|-----------------|
| Hs.443750 | Vacuolar protein sorting 45A (yeast)                                           | VPS45A   | 1.58  | 1q21-q22        |
| Hs.154433 | Cyclic nucleotide gated channel beta 3                                         | CNGB3    | 1.46  | 8q21-q22        |
| Hs.524688 | Hippocalcin like 4                                                             | HPCAL4   | -1.42 | 1p34.2          |
| Hs.160264 | Hyperpolarization activated cyclic nucleotide-gated potassium channel 4        | HCN4     | -1.43 | 15q24-q25       |
| Hs.61635  | Six transmembrane epithelial antigen of the prostate 1                         | STEAP1   | -1.44 | 7q21            |
| Hs.287827 | ATP-binding cassette, sub-family B (MDR/TAP), member 4                         | ABCB4    | -1.46 | 7q21.1          |
| Hs.194816 | Stomatin (EPB72)-like 1                                                        | STOML1   | -1.47 | 15q24-q25       |
| Hs.512681 | Sodium channel, nonvoltage-gated 1, delta                                      | SCNN1D   | -1.51 | 1p36.3-p36.2    |
| Hs.197116 | Solute carrier family 7 (cationic amino acid transporter, y+ system), member 4 | SLC7A4   | -1.64 | 22q11.21        |
| Hs.204238 | Lipocalin 2 (oncogene 24p3)                                                    | LCN2     | -1.67 | 9q34            |
| Hs.14894  | Trans-golgi network protein 2                                                  | TGOLN2   | -1.70 | 2p11.2          |
| Hs.5476   | Solute carrier family 25 (mitochondrial carrier; phosphate carrier), member 25 | SLC25A25 | -1.71 | 9q34.11         |
| Hs.2962   | S100 calcium binding protein P                                                 | S100P    | -1.72 | 4p16            |
| Hs.495674 | Chloride channel 4                                                             | CLCN4    | -1.75 | Xp22.3          |
| Hs.23388  | Apolipoprotein L domain containing 1                                           | APOLD1   | -1.87 | 12p13.1         |
| Hs.464184 | SEC14-like 1 (S. cerevisiae)                                                   | SEC14L1  | -1.92 | 17q25.1-17q25.2 |

### **Transcription and DNA related proteins**

#### ***Transcription factors and transcription regulation***

|           |                                                                                                   |         |       |               |
|-----------|---------------------------------------------------------------------------------------------------|---------|-------|---------------|
| Hs.499205 | Iroquois homeobox protein 3                                                                       | IRX3    | 1.57  | 16q12.2       |
| Hs.532277 | Zinc finger protein 250                                                                           | ZNF250  | 1.43  | 8q24.3        |
| Hs.547509 | SWI/SNF related, matrix associated, actin dependent regulator of chromatin, subfamily e, member 1 | SMARCE1 | 1.42  | 17q21.2       |
| Hs.501023 | MAX interactor 1                                                                                  | MXI1    | 1.40  | 10q24-q25     |
| Hs.220971 | FOS-like antigen 2                                                                                | FOSL2   | -1.41 | 2p23.3        |
| Hs.516922 | NK2 transcription factor related, locus 2 (Drosophila)                                            | NKX2-2  | -1.41 | 20pter-q11.23 |
| Hs.492740 | Activating transcription factor 6                                                                 | ATF6    | -1.41 | 1q22-q23      |
| Hs.179312 | Small nuclear RNA activating complex, polypeptide 1, 43kDa                                        | SNAPC1  | -1.42 | 14q22         |
| Hs.12229  | Kruppel-like factor 11                                                                            | KLF11   | -1.42 | 2p25          |
| Hs.591337 | V-myb myeloblastosis viral oncogene homolog (avian)                                               | MYB     | -1.43 | 6q22-q23      |
| Hs.62696  | Polymerase (RNA) III (DNA directed) polypeptide B                                                 | POLR3B  | -1.44 | 12q23.3       |
| Hs.127950 | Bromodomain containing 1                                                                          | BRD1    | -1.50 | 22q13.33      |
| Hs.440829 | CCAAT/enhancer binding protein (C/EBP), delta                                                     | CEBPD   | -1.52 | 8p11.2-p11.1  |
| Hs.157883 | Zinc finger protein 187                                                                           | ZNF187  | -1.52 | 6p21.31       |
| Hs.509964 | Basic leucine zipper transcription factor, ATF-like                                               | BATF    | -1.54 | 14q24.3       |
| Hs.20879  | Zinc finger protein 691                                                                           | ZNF691  | -1.54 | 1p34.2        |
| Hs.25960  | V-myc myelocytomatosis viral related oncogene, neuroblastoma derived (avian)                      | MYCN    | -1.54 | 2p24.1        |
| Hs.532286 | Glucocorticoid modulatory element binding protein 1                                               | GMEB1   | -1.55 | 1p35.3        |
| Hs.445534 | Period homolog 1 (Drosophila)                                                                     | PER1    | -1.60 | 17p13.1-17p12 |
| Hs.567425 | Androgen-induced proliferation inhibitor                                                          | APRIN   | -1.61 | 13q12.3       |
| Hs.413416 | Jumonji domain containing 1C                                                                      | JMJD1C  | -1.61 | 10q21.2       |
| Hs.31746  | Scratch homolog 1, zinc finger protein (Drosophila)                                               | SCRT1   | -1.66 | 8q24.3        |
| Hs.371987 | Nuclear factor of activated T-cells 5, tonicity-responsive                                        | NFAT5   | -1.70 | 16q22.1       |
| Hs.435413 | Metastasis associated 1 family, member 3                                                          | MTA3    | -1.75 | 2p21          |
| Hs.584806 | Transcription elongation factor B (SIII), polypeptide 3 (110kDa, elongin A)                       | TCEB3   | -1.85 | 1p36.1        |
| Hs.204475 | HIV-1 Tat specific factor 1                                                                       | HTATSF1 | -1.86 | Xq26.1-q27.2  |

|           |                                           |        |       |           |
|-----------|-------------------------------------------|--------|-------|-----------|
| Hs.490224 | CCR4-NOT transcription complex, subunit 4 | CNOT4  | -1.87 | 7q22-qter |
| Hs.460    | Activating transcription factor 3         | ATF3   | -2.00 | 1q32.3    |
| Hs.459311 | Zinc finger protein 710                   | ZNF710 | -2.08 | 15q26.1   |
| Hs.558402 | Synovial sarcoma, X breakpoint 4          | SSX4   | -2.14 | Xp11.23   |
| Hs.590941 | Zinc finger protein 8 (clone HF.18)       | ZNF8   | -2.20 | 19q13.43  |
| Hs.569908 | Transcription factor 4                    | TCF4   | -2.63 | 18q21.1   |

#### **DNA associated proteins**

|           |                                                                                                                 |               |       |          |
|-----------|-----------------------------------------------------------------------------------------------------------------|---------------|-------|----------|
| Hs.133444 | PiggyBac transposable element derived 3                                                                         | PGBD3         | 1.43  | 10q11    |
| Hs.389037 | MCM3 minichromosome maintenance deficient 3 (S. cerevisiae) associated protein                                  | MCM3AP        | 1.41  | 21q22.3  |
| Hs.305985 | Polyhomeotic-like 1 (Drosophila)                                                                                | PHC1          | -1.40 | 12p13    |
| Hs.432948 | Origin recognition complex, subunit 5-like (yeast)                                                              | ORC5L         | -1.49 | 7q22.1   |
| Hs.410406 | SWI/SNF-related, matrix-associated actin-dependent regulator of chromatin, subfamily a, containing DEAD/H box 1 | SMARCAD1      | -1.50 | 4q22-q23 |
| Hs.20158  | Aprataxin                                                                                                       | APTX          | -1.53 | 9p13.3   |
| Hs.443673 | R3H domain containing 2                                                                                         | R3HDM2        | -1.53 | 12q13.3  |
| Hs.128258 | Proliferation-inducing protein 38                                                                               | RP11-301117.1 | -1.66 | 13q14.11 |
| Hs.420757 | G patch domain containing 2                                                                                     | GPATC2        | -1.71 | 1q41     |
| Hs.435237 | Excision repair cross-complementing rodent repair deficiency, complementation group 8                           | ERCC8         | -1.82 | 5q12.1   |
| Hs.523467 | Nuclear receptor interacting protein 3                                                                          | NRIP3         | -1.96 | 11p15.3  |
| Hs.24485  | Chondroitin sulfate proteoglycan 6 (bamacan)                                                                    | CSPG6         | -2.53 | 10q25    |
| Hs.280987 | MutS homolog 3 (E. coli)                                                                                        | MSH3          | -2.89 | 5q11-q12 |

#### **Translation**

##### **RNA transport and processing**

|           |                                                               |           |       |          |
|-----------|---------------------------------------------------------------|-----------|-------|----------|
| Hs.96996  | Heterogeneous nuclear ribonucleoprotein A0                    | HNRPA0    | 1.44  | 5q31     |
| Hs.190520 | LSM6 homolog, U6 small nuclear RNA associated (S. cerevisiae) | LSM6      | -1.40 | 4q31.22  |
| Hs.387471 | Poly(A) polymerase gamma                                      | PAPOLG    | -1.41 | 2p16.1   |
| Hs.482533 | Ankyrin repeat domain 31                                      | ANKRD31   | -1.41 | 5q13.3   |
| Hs.499643 | ApoBec-1 complementation factor                               | ACF       | -1.45 | 10q11.23 |
| Hs.496279 | Zinc finger CCHC-type and RNA binding motif 1                 | ZCRB1     | -1.46 | 12q12    |
| Hs.8977   | Testis nuclear RNA-binding protein-like                       | LOC161931 | -1.52 | 16q24.1  |
| Hs.144936 | Insulin-like growth factor 2 mRNA binding protein 1           | IGF2BP1   | -1.58 | 17q21.32 |
| Hs.279806 | DEAD (Asp-Glu-Ala-Asp) box polypeptide 5                      | DDX5      | -1.69 | 17q21    |
| Hs.248815 | WD repeat domain 4                                            | WDR4      | -2.19 | 21q22.3  |

##### **Translation and post-translational modifications**

|           |                                                           |         |       |              |
|-----------|-----------------------------------------------------------|---------|-------|--------------|
| Hs.462640 | DnaJ (Hsp40) homolog, subfamily C, member 11              | DNAJC11 | -1.40 | 1p36.31      |
| Hs.158304 | Carbohydrate (chondroitin 6) sulfotransferase 3           | CHST3   | -1.40 | 10q22.1      |
| Hs.237506 | DnaJ (Hsp40) homolog, subfamily B, member 5               | DNAJB5  | -1.44 | 9p13.3       |
| Hs.158497 | ST3 beta-galactoside alpha-2,3-sialyltransferase 3        | ST3GAL3 | -1.47 | 1p34.1       |
| Hs.131431 | Eukaryotic translation initiation factor 2-alpha kinase 2 | EIF2AK2 | -1.48 | 2p22-p21     |
| Hs.158688 | Eukaryotic translation initiation factor 5B               | EIF5B   | -1.50 | 2p11.1-q11.1 |
| Hs.297304 | Glycosyltransferase 8 domain containing 1                 | GLT8D1  | -1.65 | 3p21.1       |

#### **Protein catabolism**

##### **Ubiquitin-proteasome pathway**

|           |                                                        |        |       |          |
|-----------|--------------------------------------------------------|--------|-------|----------|
| Hs.251531 | Proteasome (prosome, macropain) subunit, alpha type, 4 | PSMA4  | 1.40  | 15q25.1  |
| Hs.508524 | Calcyclin binding protein                              | CACYBP | -1.44 | 1q24-q25 |
| Hs.292804 | Ring finger protein 34                                 | RNF34  | -1.45 | 12q24.31 |
| Hs.368639 | IBR domain containing 1                                | IBRDC1 | -1.47 | 6q22.31  |
| Hs.189482 | Zinc finger protein 179                                | ZNF179 | -1.47 | 17p11.2  |
| Hs.422688 | Ubiquitination factor E4B (UFD2 homolog, yeast)        | UBE4B  | -1.47 | 1p36.3   |
| Hs.388364 | Ring finger protein 175                                | RNF175 | -1.49 | 4q31.3   |

##### **Proteases and protease inhibitors**

|           |                                                                                   |          |       |               |
|-----------|-----------------------------------------------------------------------------------|----------|-------|---------------|
| Hs.297324 | TIMP metalloproteinase inhibitor 3 (Sorsby fundus dystrophy, pseudo-inflammatory) | TIMP3    | 1.41  | 22q12.1-q13.2 |
| Hs.75285  | Inter-alpha (globulin) inhibitor H2                                               | ITIH2    | -1.41 | 10p15         |
| Hs.511522 | Protease, serine, 1 (trypsin 1)                                                   | PRSS1    | -1.43 | 7q32-qter     |
| Hs.591033 | Matrix metalloproteinase 19                                                       | MMP19    | -1.44 | 12q14         |
| Hs.997    | 26 serine protease                                                                | P11      | -1.47 | 12q13.1       |
| Hs.133085 | Carboxypeptidase A6                                                               | CPA6     | -1.48 | 8q13.2        |
| Hs.524498 | Proliferation-associated 2G4, 38kDa                                               | PA2G4    | -1.50 | 12q13         |
| Hs.55279  | Serpin peptidase inhibitor, clade B (ovalbumin), member 5                         | SERPINF5 | -1.51 | 18q21.3       |
| Hs.476604 | ADAM metalloproteinase with thrombospondin type 1 motif, 9                        | ADAMTS9  | -1.62 | 3p14.3-p14.2  |
| Hs.188746 | ADAM metalloproteinase with thrombospondin type 1 motif, 18                       | ADAMTS18 | -1.75 | 16q23         |
| Hs.164226 | Thrombospondin 1                                                                  | THBS1    | -1.82 | 15q15         |
| Hs.191540 | Vacuolar protein sorting 13B (yeast)                                              | VPS13B   | -1.82 | 8q22.2        |

#### **Others and proteins with unknown function**

|           |                                             |         |      |          |
|-----------|---------------------------------------------|---------|------|----------|
| Hs.293274 | Adenomatous polyposis coli down-regulated 1 | APCDD1  | 1.69 | 18p11.22 |
| Hs.501857 | RAB6 interacting protein 1                  | RAB6IP1 | 1.44 | 11p15.4  |
| Hs.106650 | Transmembrane protein 70                    | TMEM70  | 1.41 | 8q21.11  |
| Hs.530904 | Cysteine and glycine-rich protein 2         | CSRP2   | 1.41 | 12q21.1  |

|           |                                            |          |       |             |
|-----------|--------------------------------------------|----------|-------|-------------|
| Hs.580038 | Shugoshin-like 2 (S. pombe)                | SGOL2    | 1.40  | 2q33.1      |
| Hs.483512 | RWD domain containing 3                    | RWDD3    | -1.40 | 1p21.3      |
| Hs.23918  | Arginine vasopressin-induced 1             | AVP11    | -1.40 | 10q24.2     |
| Hs.194698 | Cyclin B2                                  | CCNB2    | -1.40 | 15q22.2     |
| Hs.376071 | Cyclin D2                                  | CCND2    | -1.41 | 12p13       |
| Hs.388841 | Zona pellucida binding protein             | ZBPB     | -1.42 | 7p14.3      |
| Hs.187459 | Zinc finger, DHHC-type containing 14       | ZDHHC14  | -1.46 | 6q25.3      |
| Hs.478465 | MAP6 domain containing 1                   | MAP6D1   | -1.46 | 3q27.1      |
| Hs.513260 | DDHD domain containing 1                   | DDHD1    | -1.47 | 14q21       |
| Hs.132050 | T-complex 11 (mouse) like 2                | TCP11L2  | -1.50 | 12q23.3     |
| Hs.496459 | Torsin A interacting protein 1             | TOR1AIP1 | -1.53 | 1q24.2      |
| Hs.157078 | Angel homolog 2 (Drosophila)               | ANGEL2   | -1.57 | 1q32.3      |
| Hs.462445 | B9 protein                                 | EPPB9    | -1.57 | 17p11.2     |
| Hs.523710 | Zinc finger, DHHC-type containing 18       | ZDHHC18  | -1.60 | 1p36.11     |
| Hs.444673 | Cisplatin resistance related protein CRR9p | CRR9     | -2.16 | 5pter-p15.3 |

### Hypothetical proteins and EST

|           |                                                                                                                                                                                                |               |       |          |
|-----------|------------------------------------------------------------------------------------------------------------------------------------------------------------------------------------------------|---------------|-------|----------|
| Hs.594119 | Homo sapiens, clone IMAGE:3881549, mRNA                                                                                                                                                        |               | 1.61  |          |
| Hs.154652 | Chromosome 8 open reading frame 72                                                                                                                                                             | C8orf72       | 1.55  | 8q12.1   |
| Hs.179260 | Chromosome 14 open reading frame 4                                                                                                                                                             | C14orf4       | 1.52  | 14q24.3  |
| Hs.473374 | Transcribed locus                                                                                                                                                                              |               | 1.49  |          |
| Hs.596306 | Transcribed locus                                                                                                                                                                              |               | 1.48  |          |
| Hs.606700 | Transcribed locus                                                                                                                                                                              |               | 1.48  |          |
| Hs.519749 | Hypothetical gene LOC133874                                                                                                                                                                    | LOC133874     | 1.47  | 5q35.1   |
| Hs.175322 | Full-length cDNA clone CS0DK012Y110 of HeLa cells Cot 25-normalized of Homo sapiens (human)                                                                                                    |               | 1.47  |          |
| Hs.128813 | Chromosome 17 open reading frame 69                                                                                                                                                            | C17orf69      | 1.47  | 17q21.31 |
| Hs.570828 | Transcribed locus, strongly similar to NP_056208.1 DKFZP564O0823 protein [Homo sapiens]                                                                                                        |               | 1.46  |          |
| Hs.471582 | Transcribed locus, moderately similar to XP_526052.1 PREDICTED: similar to SP140 nuclear body protein isoform 1; nuclear body protein Sp140; lymphoid-specific SP100 homolog [Pan troglodytes] |               | 1.45  |          |
| Hs.362702 | Hypothetical protein FLJ32745                                                                                                                                                                  | FLJ32745      | 1.45  | 2q13     |
| Hs.596041 | Transcribed locus                                                                                                                                                                              |               | 1.42  |          |
| Hs.370287 | Clone 23688 mRNA sequence                                                                                                                                                                      |               | 1.42  |          |
| Hs.112680 | CDNA FLJ32757 fis, clone TEST12001766                                                                                                                                                          |               | 1.41  |          |
| Hs.544544 | Transcribed locus                                                                                                                                                                              |               | 1.41  |          |
| Hs.604548 | Transcribed locus                                                                                                                                                                              |               | 1.41  |          |
| Hs.568874 | Transcribed locus, strongly similar to XP_529329.1 PREDICTED: hypothetical protein XP_529329 [Pan troglodytes]                                                                                 |               | 1.40  |          |
| Hs.121347 | Chromosome 10 open reading frame 82                                                                                                                                                            | C10orf82      | 1.40  | 10q25.3  |
| Hs.49530  | Transcribed locus, strongly similar to XP_293581.4 PREDICTED: similar to seven transmembrane helix receptor [Homo sapiens]                                                                     |               | 1.40  |          |
| Hs.562622 | Transcribed locus                                                                                                                                                                              |               | 1.40  |          |
| Hs.288959 | Hypothetical protein FLJ20920                                                                                                                                                                  | FLJ20920      | -1.40 | 17q21.33 |
| Hs.545338 | Transcribed locus                                                                                                                                                                              |               | -1.40 |          |
| Hs.593198 | Transcribed locus                                                                                                                                                                              |               | -1.40 |          |
| Hs.164705 | Chromosome 11 open reading frame 63                                                                                                                                                            | C11orf63      | -1.40 | 11q24.1  |
| Hs.37517  | Transcribed locus, weakly similar to NP_997349.1 FLJ46489 protein [Homo sapiens]                                                                                                               |               | -1.41 |          |
| Hs.58185  | Full length insert cDNA clone ZD70D07                                                                                                                                                          |               | -1.42 |          |
| Hs.128757 | Transcribed locus, strongly similar to NP_954587.1 hypothetical protein MGC72075 [Homo sapiens]                                                                                                |               | -1.42 |          |
| Hs.595915 | Transcribed locus                                                                                                                                                                              |               | -1.42 |          |
| Hs.69658  | Transcribed locus                                                                                                                                                                              |               | -1.43 |          |
| Hs.181297 | Hypothetical protein LOC283663                                                                                                                                                                 | LOC283663     | -1.43 | 15q21.3  |
| Hs.91521  | Hypothetical protein DKFZP761M1511                                                                                                                                                             | DKFZP761M1511 | -1.44 | 5q35.2   |
| Hs.604793 | Transcribed locus                                                                                                                                                                              |               | -1.44 |          |
| Hs.520785 | Hypothetical protein FLJ12700                                                                                                                                                                  | FLJ12700      | -1.44 | 7q36.1   |
| Hs.355747 | Hypothetical LOC388610                                                                                                                                                                         | LOC388610     | -1.44 | 1p36.11  |
| Hs.156506 | Similar to RIKEN cDNA A430101B06 gene                                                                                                                                                          | MGC13017      | -1.44 | 5q31.1   |
| Hs.591597 | Hypothetical protein LOC200609                                                                                                                                                                 | LOC200609     | -1.45 | 2q37.3   |
| Hs.597340 | Transcribed locus                                                                                                                                                                              |               | -1.45 |          |
| Hs.599805 | Transcribed locus                                                                                                                                                                              |               | -1.45 |          |
| Hs.594466 | Transcribed locus                                                                                                                                                                              |               | -1.46 |          |
| Hs.591027 | Small trans-membrane and glycosylated protein                                                                                                                                                  | LOC57228      | -1.46 | 12q13.13 |
| Hs.432401 | Transcribed locus, strongly similar to NP_821092.1 proline rich membrane anchor 1; acetylcholinesterase membrane anchor precursor PRiMA [Homo sapiens]                                         |               | -1.46 |          |
| Hs.135536 | Transcribed locus                                                                                                                                                                              |               | -1.46 |          |
| Hs.438991 | Chromosome 10 open reading frame 61                                                                                                                                                            | C10orf61      | -1.46 | 10q23.33 |
| Hs.8429   | Transcribed locus                                                                                                                                                                              |               | -1.47 |          |
| Hs.368296 | Chromosome 11 open reading frame 49                                                                                                                                                            | C11orf49      | -1.48 | 11p11.2  |
| Hs.579269 | GRB2-related adaptor protein-like                                                                                                                                                              | LOC400581     | -1.48 | 17p11.2  |
| Hs.585548 | KIAA0692                                                                                                                                                                                       | KIAA0692      | -1.50 | 12q24.33 |

|           |                                                                                                                                                                                     |           |       |          |
|-----------|-------------------------------------------------------------------------------------------------------------------------------------------------------------------------------------|-----------|-------|----------|
| Hs.569494 | Clone 23963 mRNA sequence                                                                                                                                                           |           | -1.51 |          |
| Hs.529860 | Homo sapiens, clone IMAGE:3851018, mRNA                                                                                                                                             |           | -1.52 |          |
| Hs.448889 | Hypothetical protein LOC440465                                                                                                                                                      | FLJ90757  | -1.52 | 17q25.3  |
| Hs.188825 | Full length insert cDNA YQ80D07                                                                                                                                                     |           | -1.52 |          |
| Hs.525445 | Chromosome 14 open reading frame 168                                                                                                                                                | C14orf168 | -1.53 | 14q24.3  |
| Hs.526528 | Transcribed locus                                                                                                                                                                   |           | -1.54 |          |
| Hs.135282 | Transcribed locus, strongly similar to XP_510270.1 PREDICTED:<br>similar to C15orf16 protein [Pan troglodytes]                                                                      |           | -1.54 |          |
| Hs.591724 | Transcribed locus                                                                                                                                                                   |           | -1.55 |          |
| Hs.92993  | Transcribed locus                                                                                                                                                                   |           | -1.55 |          |
| Hs.432566 | Transcribed locus, weakly similar to XP_518535.1 PREDICTED:<br>similar to dJ108C2.1.4 (MCM3 minichromosome maintenance<br>deficient 3 (S. cerevisiae), variant 4) [Pan troglodytes] |           | -1.55 |          |
| Hs.594110 | Transcribed locus                                                                                                                                                                   |           | -1.56 |          |
| Hs.537948 | Transcribed locus                                                                                                                                                                   |           | -1.56 |          |
| Hs.597729 | Transcribed locus                                                                                                                                                                   |           | -1.56 |          |
| Hs.546449 | Hypothetical protein MGC4268                                                                                                                                                        | MGC4268   | -1.57 | 2q21     |
| Hs.434251 | KIAA0690                                                                                                                                                                            | KIAA0690  | -1.58 | 10q24.1  |
| Hs.348809 | Transcribed locus                                                                                                                                                                   |           | -1.58 |          |
| Hs.190342 | Transcribed locus                                                                                                                                                                   |           | -1.58 |          |
| Hs.519855 | Chromosome 6 open reading frame 201                                                                                                                                                 | C6orf201  | -1.59 | 6p25.2   |
| Hs.565253 | Hypothetical protein LOC148189                                                                                                                                                      | LOC148189 | -1.59 | 19q12    |
| Hs.166551 | Chromosome 5 open reading frame 3                                                                                                                                                   | C5orf3    | -1.60 | 5q31-q33 |
| Hs.30567  | Homo sapiens, clone IMAGE:4346533, mRNA                                                                                                                                             |           | -1.62 |          |
| Hs.481936 | Hypothetical protein FLJ13231                                                                                                                                                       | FLJ13231  | -1.63 | 5p13.2   |
| Hs.592534 | Transcribed locus                                                                                                                                                                   |           | -1.64 |          |
| Hs.59115  | Chromosome 8 open reading frame 16                                                                                                                                                  | C8orf16   | -1.66 | 8p23.1   |
| Hs.541810 | Transcribed locus                                                                                                                                                                   |           | -1.69 |          |
| Hs.591268 | Hypothetical LOC553103                                                                                                                                                              | LOC553103 | -1.78 |          |
| Hs.525826 | YDD19 protein                                                                                                                                                                       | YDD19     | -1.81 | 13q12    |
| Hs.348390 | Chromosome 9 open reading frame 26 (NF-HEV)                                                                                                                                         | C9orf26   | -1.81 | 9p24.1   |
| Hs.528335 | Hypothetical protein FLJ25477                                                                                                                                                       | FLJ25477  | -1.83 | 13q12.13 |
| Hs.124331 | Transcribed locus                                                                                                                                                                   |           | -1.83 |          |
| Hs.93675  | Chromosome 10 open reading frame 10                                                                                                                                                 | C10orf10  | -1.89 | 10q11.21 |
| Hs.356479 | Transcribed locus, strongly similar to NP_004170.1 tryptophan<br>hydroxylase 1; tryptophan 5-monooxygenase; tryptophan<br>hydroxylase (tryptophan 5-monooxygenase) [Homo sapiens]   |           | -2.17 |          |
| Hs.382151 | Chromosome 20 open reading frame 160                                                                                                                                                | C20orf160 | -2.26 | 20q11.2  |
