# Supplementary material
Source: HighWire-hosted journal article supplement (https://diabetes.diabetesjournals.org/content/suppl/2007/01/19/db06-1242)
Supplement: db06-1242_Supplementary_Table_3.pdf [file db06-1242_Supplementary_Table_3.pdf]

Supplementary Table 3

**Changes in genes expression measured by RT-quantitative PCR in skeletal muscle and adipose tissue during the somatostatin control study.**

The fold changes in mRNA levels during the somatostatin control study were measured on tissue samples from 4 subjects for skeletal muscle and adipose tissue. RT-qPCR was performed as indicated under “research design and methods”. Values were corrected by the mRNA level of hypoxanthine phosphoribosyl transferase (HPRT) used as a house-keeping gene.

\*p<0.05 after vs. before hyperglycemic clamp or after vs. before somatostatin infusion, using the Student’s paired t test. ND: not detectable in a reliable manner using RT-qPCR.

| Transcript Symbol | Unigene Cluster | Skeletal Muscle     |                            | Adipose Tissue      |                            |
|-------------------|-----------------|---------------------|----------------------------|---------------------|----------------------------|
|                   |                 | Hyperglycemic clamp | Somatostatin control study | Hyperglycemic clamp | Somatostatin control study |
| <b>AGTRL1</b>     | Hs.438311       | 1.29 ± 0.10         | -1.57 ± 0.05*              | -1.33 ± 0.13*       | -1.15 ± 0.16               |
| <b>G0S2</b>       | Hs.432132       | 2.01 ± 0.48*        | -1.51 ± 0.19               | 1.12 ± 0.16         | -1.08 ± 0.29               |
| <b>GSTP1</b>      | Hs.523836       | -1.45 ± 0.08 *      | -1.24 ± 0.24               | -1.41 ± 0.08*       | 1.44 ± 0.34                |
| <b>HK2</b>        | Hs.591588       | 1.51 ± 0.20*        | -1.19 ± 0.15               | 1.52 ± 0.24*        | 1.12 ± 0.32                |
| <b>JAM2</b>       | Hs.517227       | -1.53 ± 0.17*       | -1.41 ± 0.10               | -1.02 ± 0.09        | -1.36 ± 0.26               |
| <b>MT1X</b>       | Hs.374950       | 1.54 ± 0.13*        | 1.72 ± 0.35                | 1.53 ± 0.14*        | 1.36 ± 0.22                |
| <b>MT2A</b>       | Hs.534330       | 1.41 ± 0.14*        | 1.26 ± 0.14                | 1.37 ± 0.12*        | 1.20 ± 0.15                |
| <b>MT1F</b>       | Hs.513626       | ND                  | ND                         | 2.34 ± 0.46         | 1.07 ± 0.27                |
| <b>PDK4</b>       | Hs.8364         | -4.09 ± 0.99*       | 5.90 ± 1.41*               | -2.49 ± 0.36*       | 2.20 ± 0.49*               |
| <b>PER1</b>       | Hs.445534       | -1.75 ± 0.20*       | -1.15 ± 0.45               | -1.55 ± 0.17*       | 1.01 ± 0.30                |
| <b>TNFSF10</b>    | Hs.478275       | 1.47 ± 0.21 *       | 1.15 ± 0.18                | 1.76 ± 0.23*        | 1.57 ± 0.33                |
